# Supplementary material
Source: Research Square preprint supplement (doi:10.21203/rs.3.rs-10130912/v1)
Supplement: Supplementary file 1 [file 36b7d157d70e68df8307d063.docx]

**Supplementary Materials**

Article title : Association of sex with hemostatic parameters in abnormal-weight patients with paroxysmal atrial fibrillation treated with direct oral anticoagulants: a retrospective study

Journal : Heart and Vessels

Authors: Jan Budzianowski, Wiesław Sikora, Edyta Kawka, Rafał Rutkowski, Weronika Majchrowicz, Dominika Kanikowska, Katarzyna Korybalska

Corresponding author:

Jan Budzianowski, MD, PhD
University of Zielona Góra, Collegium Medicum
Department of Interventional Cardiology and Cardiac Surgery
65-046 Zielona Góra, Poland
[*jbudzianowski@uz.zgora.pl*](mailto:jbudzianowski@uz.zgora.pl)

Table S1

Parameters involved in hemostasis detected in serum females and males with paroxysmal AF treated with DOACs according to BMI value (BMI kg/m2<29.9-overweight; BMI kg/m2>30 obesity). The unpaired data were analyzed using parametric (unpaired t-test with Welch’s correction) and nonparametric (Mann-Whitney) t-tests.

| Parameters | Females | | Males | |
| --- | --- | --- | --- | --- |
| Overweight  n=11 | Obese  n=19 | Overweight  n=17 | Obese  n=18 |
| BMI,kg/m2 | ^25.7  (23.3-27.4) | ^35.0 ****  (30,0-42.5) | 26.8  (22.2-29.7) | 31.2****  (30.0-37.4) |
| Age, years | 63 (49-73) | ^^64 (43-73) | 66 (50-70) | 57 (48-71)** |
| CHA2DS2-VASc | 2 (1-3) | ^^^^3 (1-6)* | 1 (0-3) | 1 (0-3) |
| CHA2DS2-VA | 1 (0-2) | 2 (0-5)* | 1 (0-3) | 1 (0-3) |
| Fibrinogen, mg/dL | 369  (269-780) | **^^^**405  (300-515) | 348  (274-484) | 339  (222-415) |
| D-Dimers, µg/mL | ^0.27  (0.03-0.68) | 0.16  (0.06-1.36) | 0.13  (0.02-0.95) | 0.14  (0.04-0.30) |
| Endothelial-derived | | | | |
| t-PA, ng/mL | 1.23 (0.71-1.8) | 1.6 (0.67-3.1) | 1.2 (0.71-2.0) | 1.4 (0.72-2.0) |
| PAI-1, ng/mL | 18.0  (10.6-23.9) | 19.2  (10.8-37.5) | 16.8 (10.7-38.1) | 18.0 (12.4-49.4) |
| vWF, ng/mL | 1.8 (0.87-3.2) | 1.6 (0.17-4.7) | 2.7 (0.46-5.4) | 1.8 (0.85-5.1) |
| TM, ng/mL | 3.3 (2.4-5.1) | 3.7 (2.3-5.7) | 3.3 (0.94-7.9) | 3.1 (1.1-6.0) |
| Platelet-deriveed | | | | |
| PLT, 103/mL | 212 (123-302) | 240 (175-340) | 204 (140-311) | 214 (95-300) |
| sCD40L, pg/mL | 587.8  (289.7-915.9) | 558.3  (179.2-985.5) | 494.3  (189.8-986.1) | 527.1  (274.7-1020.0) |
| B-TG/CXCL7, ng/mL | 5.0 (0.66-7.5) | **^**6.2 (1.5-11.9) | 5.1 (0.48-10.3) | 4.4 (0.61-7.7) |

Abbreviation: BMI - body mass index; CHA2DS2-VASc - Congestive heart failure, Hypertension, Age ≥ 75, Diabetes, Stroke, Vascular disease, Age 65–74, Sex (female); CHA2DS2-VA - Congestive heart failure, Hypertension, Age ≥ 75, Diabetes, Stroke, Vascular disease, Age 65–74; t-PA – tissue plasminogen activator; PAI-1 – plasminogen activator inhibitor 1; vWF - von Willebrand factor; sTM – soluble thrombomodulin; sCD40L – soluble ligand CD40 (release from activated platelets); B-TG/CXCL7 - β-Thromboglobulin (chemokine secreted from platelets).

Significance difference: overweight vs. obese: *p<0,05, **p<0.01, ***p<0,001, ****p<0,0001

Significance difference: females vs. males: **^**p<0,05, **^^**p<0.01 **^^^**p<0.001 **^^^^**p<0.0001

Table S2

Parameters involved in hemostasis detected in serum females and males with paroxysmal AF treated with DOACs according to median GFR value (female median – 66 mL/min/1.73 m²; males median - 80 mL/min/1.73 m²). The unpaired data were analyzed using parametric (unpaired t-test with Welch’s correction) and nonparametric (Mann-Whitney) t-tests.

| Parameters | Females n=30 (all) | | Males n=35 (all) | |
| --- | --- | --- | --- | --- |
| below median  n=16 | above median  n=14 | below median  n=18 | above median  n=17 |
| GFR, mL/min/1.73 m2 | 64  (44-66) | ^^77 ****  (68-114) | 68  (50-80) | 93****  (84-135) |
| GFR< 60 mL/min/1.73 m2 n, (%)  n (% from all) | 6 (37)  6 (20) | ---------- | 5 (27)  5 (14) | -------- |
| BMI, kg/m2 | 30.5 (23.3-39.7 | 31.9 (25.5-42.5) | 29.8 (24.6-37.4) | 30.1 (22.2-35.9) |
| Age, years | ^^66 (61-73) | 62 (43-69)** | 62 (48-69) | 61 (50-71) |
| CHA2DS2-VASc | ^^3 (1-6) | ^2 (1-3)* | 1 (0-3) | 1 (0-3) |
| CHA2DS2-VA | 2 (0-5) | 1 (0-2)* | 1 (0-3) | 1 (0-3) |
| Fibrinogen, mg/dL | ^^412.5  (300.0-780.0) | 381.5*  (269.0-442.0) | 359.0  (253.1-479.2) | 337.0  (222.5-484.2) |
| D-Dimers, µg/mL | 0.18 (0.05-0.54) | ^0.20 90.03-1.4) | 0.20 (0.02-0.95) | 0.13 (0.04-0.28) |
| Endothelial-derived | | | | |
| t-PA, ng/mL | 1.5 (0.67-3.1) | 1.3 (0.7-2.9) | 1.3 (0.8-2.0) | 1.1 (0.71-1.9) |
| PAI-1, ng/mL | 18.6 (10.6-35.1) | 19.4 (14.9-37.5) | 17.4 (10.2-34.9) | 17.5 (11.4-49.4) |
| vWF, ng/mL | 2.0 (1.1-4.7) | 1.3 (0.17-3.2)** | 2.4 (0.85-5.4) | 1.8 (0.46-5.1) |
| TM, ng/mL | 3.8 (2.7-5.7) | 3.1 (2.3-4.5)* | 3.4 (1.1-9.9) | 3.0 (0.94-6.0) |
| Platelet-deriveed | | | | |
| PLT, 103/mL | 226 (123-310) | 225 (175-340) | 210 (133-300) | 204 (95-311) |
| sCD40L, pg/mL | 491.7  (179.2-985.5) | 572.2  (271.2-809.9) | 572.1  (169.8-857.2) | 498.9  (221.4-1020 |
| B-TG/CXCL7, ng/mL | 6.2 (0.66-11.8) | 5.8 (1.5-10.9) | 4.7 (0.48-7.7) | 4.7 (0.61-10.3) |

Abbreviation: BMI - body mass index; CHA2DS2-VASc - Congestive heart failure, Hypertension, Age ≥ 75, Diabetes, Stroke, Vascular disease, Age 65–74, Sex (female); CHA2DS2-VA - Congestive heart failure, Hypertension, Age ≥ 75, Diabetes, Stroke, Vascular disease, Age 65–74; t-PA – tissue plasminogen activator; PAI-1 – plasminogen activator inhibitor 1; vWF - von Willebrand factor; sTM – soluble thrombomodulin; sCD40L – soluble ligand CD40 (release from activated platelets); B-TG/CXCL7 - β-Thromboglobulin (chemokine secreted from platelets). Significance difference: below median vs. above median: *p<0,05, **p<0.01, ***p<0,001, ****p<0,0001 Significance difference: females vs. males: **^**p<0,05, **^^**p<0.01 **^^^**p<0.001 **^^^^**p<0.0001
